# Supplementary material for: Infant Gut Microbiota Associated with Fine Motor Skills
Source: MDPI journal article supplement (doi:10.3390/nu13051673), 2021-05-14
Supplement: s1 [file s1]

**Table S1. General characteristics of the studied population**

| <b>Maternal characteristics</b>          |                  |
|------------------------------------------|------------------|
| <b>Age (years)</b>                       | 33.3 (4.17)      |
| <b>Pre-pregnancy BMI</b>                 |                  |
| Normal-Weight                            | 21 (28.58%)      |
| Overweight                               | 33 (46.48%)      |
| Obesity                                  | 17 (23.94%)      |
| <b>Pre-pregnancy weight (kg)</b>         | 72.27 (14.7)     |
| <b>Weight gain (kg)</b>                  | 8.51 (6.33)      |
| <b>Diabetes</b>                          |                  |
| Yes                                      | 29 (40.85%)      |
| No                                       | 42 (59.15%)      |
| <b>Education</b>                         |                  |
| Primary/Secondary                        | 38 (55.07%)      |
| University                               | 31 (44.93%)      |
| <b>Smoking during pregnancy</b>          |                  |
| Yes                                      | 6 (8.45%)        |
| No                                       | 65 (91.55%)      |
| <b>Drinking alcohol during pregnancy</b> |                  |
| Yes                                      | 2 (2.82%)        |
| No                                       | 69 (97.18%)      |
| <b>Type of delivery</b>                  |                  |
| Eutocic                                  | 42 (59.15%)      |
| Dystocic                                 | 9 (12.68%)       |
| Cesarean                                 | 20 (28.17%)      |
| <b>Infant characteristics</b>            |                  |
| <b>Sex</b>                               |                  |
| Male                                     | 45 (63.38%)      |
| Female                                   | 26 (36.62%)      |
| <b>Birth weight (g)</b>                  | 3272.68 (529.72) |
| <b>Birth length (cm)</b>                 | 50.2 (2.02)      |
| <b>Birth head Circumference (cm)</b>     | 34.69 (1.39)     |
| <b>Placenta (g)</b>                      | 517.21 (119.79)  |
| <b>Breastfeeding</b>                     |                  |
| Exclusive                                | 43 (60.56%)      |
| Mixed                                    | 9 (12.68%)       |
| Artificial                               | 19 (26.76%)      |

Values listed are total for the variable (percent of total value n) or Means (SD).

**Table S2. Distribution of Bayley®-III scores of infant development in 71 full-term healthy infants at the age of 18 months**

| Receptive language | n  | Expressive language | n  | Fine motor | n  | Gross motor | n  | Composite cognitive | n  | Composite language | n  |
|--------------------|----|---------------------|----|------------|----|-------------|----|---------------------|----|--------------------|----|
| 8                  | 1  | 6                   | 3  | 8          | 2  | 7           | 1  | 90                  | 1  | 83                 | 1  |
| 9                  | 1  | 7                   | 3  | 9          | 2  | 8           | 2  | 95                  | 1  | 89                 | 1  |
| 10                 | 7  | 8                   | 6  | 10         | 4  | 10          | 9  | 100                 | 1  | 91                 | 1  |
| 11                 | 19 | 9                   | 7  | 11         | 7  | 11          | 19 | 105                 | 6  | 94                 | 5  |
| <b>12*</b>         | 25 | 10                  | 13 | 12         | 16 | <b>12*</b>  | 14 | 110                 | 2  | 97                 | 5  |
| 13                 | 12 | <b>11*</b>          | 22 | <b>13*</b> | 14 | 13          | 14 | 115                 | 9  | 100                | 2  |
| 14                 | 5  | 12                  | 7  | 14         | 17 | 14          | 1  | 120                 | 8  | 103                | 14 |
| 15                 | 1  | 13                  | 6  | 15         | 6  | 15          | 9  | <b>125*</b>         | 15 | <b>106*</b>        | 9  |
|                    |    | 14                  | 3  | 16         | 1  | 16          | 1  | 130                 | 11 | 109                | 13 |
|                    |    | 15                  | 1  | 17         | 1  | 17          | 1  | 135                 | 12 | 112                | 8  |
|                    |    |                     |    | 19         | 1  |             |    | 140                 | 5  | 115                | 4  |
|                    |    |                     |    |            |    |             |    |                     |    | 118                | 3  |
|                    |    |                     |    |            |    |             |    |                     |    | 121                | 4  |
|                    |    |                     |    |            |    |             |    |                     |    | 124                | 1  |

\* Median scores for each Bayley®-III scale

**Table S4. Association between a-diversity indexes and each Bayley®-III scale. T-Student test.**

|                     |                 | Observed OTUs    |                  | PD Whole Tree    |                  | SDI              |                  |
|---------------------|-----------------|------------------|------------------|------------------|------------------|------------------|------------------|
|                     |                 | Below the median | Above the median | Below the median | Above the median | Below the median | Above the median |
| Composite language  | Mean            | 247.07           | 259              | 14.22            | 14.43            | 2.87             | 3.04             |
|                     | (SD)            | (62.39)          | (54.35)          | (2.42)           | (2.18)           | (0.74)           | (0.52)           |
|                     | <i>p</i> -value | 0.394            |                  | 0.705            |                  | 0.245            |                  |
| Expressive language | Mean            | 244.67           | 262.03           | 14.28            | 14.4             | 2.88             | 3.05             |
|                     | (SD)            | (51.67)          | (62.11)          | (2.07)           | (2.46)           | (0.68)           | (0.56)           |
|                     | <i>p</i> -value | 0.209            |                  | 0.814            |                  | 0.242            |                  |
| Receptive language  | Mean            | 256.14           | 252.45           | 14.71            | 14.1             | 2.93             | 3                |
|                     | (SD)            | (61.27)          | (55.9)           | (2.41)           | (2.16)           | (0.51)           | (0.7)            |
|                     | <i>p</i> -value | 0.794            |                  | 0.268            |                  | 0.681            |                  |
| Fine motor          | Mean            | 253.32           | 254.45           | 14.42            | 14.28            | 2.95             | 2.98             |
|                     | (SD)            | (56.74)          | (59.25)          | (2.31)           | (2.27)           | (0.48)           | (0.72)           |
|                     | <i>p</i> -value | 0.936            |                  | 0.802            |                  | 0.828            |                  |
| Gross motor         | Mean            | 254.77           | 253.33           | 14.25            | 14.42            | 2.97             | 2.97             |
|                     | (SD)            | (60.26)          | (56.51)          | (2.61)           | (2)              | (0.66)           | (0.6)            |
|                     | <i>p</i> -value | 0.917            |                  | 0.758            |                  | 0.965            |                  |
| Composite cognitive | Mean            | 253.5            | 254.26           | 14.39            | 14.32            | 2.97             | 2.97             |
|                     | (SD)            | (75.17)          | (43.89)          | (2.84)           | (1.84)           | (0.74)           | (0.54)           |
|                     | <i>p</i> -value | 0.957            |                  | 0.898            |                  | 0.978            |                  |

PD Whole Tree: Faith's Phylogenetic Diversity Whole Tree; SDI: Shannon Diversity Index

**Table S5. Associations between gut microbiota composition (16S rDNA gene sequences) and Bayley®-III scales according to the weighted UniFrac.**

|                     | F model | R <sup>2</sup> | <i>p</i> value |
|---------------------|---------|----------------|----------------|
| Composite language  | 0.546   | 0.008          | 0.816          |
| Expressive language | 0.487   | 0.007          | 0.846          |
| Receptive language  | 0.758   | 0.011          | 0.517          |
| Fine motor          | 2.877   | 0.04           | <b>0.021*</b>  |
| Gross motor         | 0.632   | 0.009          | 0.699          |
| Composite cognitive | 0.892   | 0.013          | 0.469          |

\**p*-values ≤ 0.05 are highlighted in bold

**Table S6. Associations between gut microbiota composition (16S rDNA gene sequences) and Bayley®-III scales according to the unweighted UniFrac.**

|                     | F model | R <sup>2</sup> | <i>p</i> value |
|---------------------|---------|----------------|----------------|
| Composite language  | 0.785   | 0.011          | 0.895          |
| Expressive language | 0.992   | 0.014          | 0.481          |
| Receptive language  | 0.744   | 0.011          | 0.944          |
| Fine motor          | 0.956   | 0.014          | 0.552          |
| Gross motor         | 0.876   | 0.013          | 0.743          |
| Composite cognitive | 0.985   | 0.014          | 0.502          |

**Table S7. Associations between gut microbiota composition (16S rDNA gene sequences) and other variables of interest according to the weighted UniFrac.**

|                                   | F model | R <sup>2</sup> | <i>p</i> value |
|-----------------------------------|---------|----------------|----------------|
| Maternal age                      | 0.609   | 0.008          | 0.720          |
| Pre-pregnancy BMI                 | 4.434   | 0.059          | <b>0.005*</b>  |
| Pre-pregnancy weight              | 0.550   | 0.007          | 0.770          |
| Maternal diabetes                 | 1.581   | 0.021          | 0.126          |
| Smoking during pregnancy          | 0.248   | 0.003          | 0.989          |
| Drinking alcohol during pregnancy | 1.012   | 0.013          | 0.393          |
| Type of delivery                  | 1.019   | 0.027          | 0.405          |
| Infant sex                        | 0.880   | 0.012          | 0.446          |
| Birth weight                      | 1.247   | 0.016          | 0.242          |
| Breastfeeding up to 3 months      | 2.862   | 0.038          | <b>0.023*</b>  |
| Breastfeeding up to 6 months      | 0.766   | 0.010          | 0.569          |

\**p*-values ≤ 0.05 are highlighted in bold
